# Supplementary material for: Treatment patterns and clinical outcomes of asciminib in a real-world multiresistant chronic myeloid leukemia patient population
Source: PubMed Central journal article supplement — Haematologica. 2022 Sep 8;108(1):240–4. doi: 10.3324/haematol.2022.281386 (PMC9827157; doi:10.3324/haematol.2022.281386), 2022-09-08
Supplement: 2022_281386_KOCKEROLS_SUPPL.pdf [file 2022_281386_KOCKEROLS_SUPPL.pdf]

# Treatment patterns and clinical outcomes of asciminib in a real-world multiresistant chronic myeloid leukemia patient population

Camille C.B. Kockerols,<sup>1</sup> Jeroen J.W.M. Janssen,<sup>2</sup> Nicole M.A. Blijlevens,<sup>3</sup> Saskia K. Klein,<sup>4</sup> Laura G.M. van Hussen-Daenen,<sup>5</sup> Gwendolyn G.Y. van Gorkom,<sup>6</sup> Willem M. Smit,<sup>7</sup> Peter van Balen,<sup>8</sup> Bart J. Biemond,<sup>9</sup> Marjan J. Cruijssen,<sup>10</sup> Maarten F. Corsten,<sup>11</sup> Peter A.W. te Boekhorst,<sup>12</sup> Harry R. Koene,<sup>13</sup> Geerte L. van Sluis,<sup>14</sup> Jan J. Cornelissen<sup>12</sup> and Peter E. Westerweel<sup>1</sup>

<sup>1</sup>Department of Internal Medicine, Albert Schweitzer Hospital, Dordrecht; <sup>2</sup>Department of Hematology, Amsterdam University Medical Centers, location VUMC, Amsterdam; <sup>3</sup>Department of Hematology, Radboud University Medical Center, Nijmegen; <sup>4</sup>Department of Hematology, University Medical Center Groningen, Groningen; <sup>5</sup>Department of Hematology, University Medical Center Utrecht, Utrecht; <sup>6</sup>Department of Hematology, Maastricht University Medical Center, Maastricht; <sup>7</sup>Department of Hematology, Medisch Spectrum Twente, Enschede; <sup>8</sup>Department of Hematology, Leiden University Medical Center, Leiden; <sup>9</sup>Department of Hematology, Amsterdam University Medical Center, location AMC, Amsterdam; <sup>10</sup>Department of Hematology, Catharina Hospital, Eindhoven; <sup>11</sup>Department of Hematology, Meander Medical Center, Amersfoort; <sup>12</sup>Department of Hematology, Erasmus University Medical Center, Rotterdam; <sup>13</sup>Department of Hematology, St.-Antonius Hospital, Nieuwegein and <sup>14</sup>Department of Hematology, Isala Hospital, Zwolle, the Netherlands

Correspondence:

C.C.B. KOCKEROLS - c.c.b.kockerols@asz.nl

<https://doi.org/10.3324/haematol.2022.281386>

**Treatment patterns and clinical outcome of asciminib in a real-world multi-resistant Chronic Myeloid Leukemia patient population.**

**SUPPLEMENTAL DATA**

| <b>Asciminib adverse events (n=53)</b> | <b>Frequency, all</b> | <b>Frequency, CTC grade 3-4</b> | <b>Relation</b> | <b>Dose modification or interruption</b> |
|----------------------------------------|-----------------------|---------------------------------|-----------------|------------------------------------------|
| <b>Hematological events</b>            | <b>14 pts</b>         | <b>3 pts</b>                    |                 |                                          |
| <i>Thrombocytopenia</i>                | 12                    | 3                               | Probable        | 3                                        |
| <i>Neutropenia</i>                     | 4                     | 1                               | Probable        | 1                                        |
| <i>Anemia</i>                          | 7                     | 2                               | Probable        | 1                                        |
| <b>Cutaneous events</b>                | <b>8 pts</b>          | <b>0 pts</b>                    |                 | <b>0</b>                                 |
| <i>Folliculitis, rash</i>              | 6                     | 0                               | Probable        | 0                                        |
| <i>Pruritus</i>                        | 1                     | 0                               | Probable        | 0                                        |
| <i>Verrucae</i>                        | 1                     | 0                               | Unclear         | 0                                        |
| <b>Cardiovascular events</b>           | <b>2 pts</b>          | <b>1 pt</b>                     |                 | <b>0</b>                                 |
| <i>TIA</i>                             | 1                     | 1                               | Unlikely        | 0                                        |
| <i>NSTEMI</i>                          | 1                     | 1                               | Possible        | 0                                        |
| <b>Other events</b>                    | <b>7 pts</b>          | <b>1 pt</b>                     |                 |                                          |
| <i>Pyrosis</i>                         | 1                     | 0                               | Possible        | 1                                        |
| <i>Hyperglycemia</i>                   | 1                     | 0                               | Possible        | 0                                        |
| <i>Pain lower extremity</i>            | 1                     | 0                               | Unclear         | 0                                        |
| <i>Fatigue</i>                         | 1                     | 0                               | Probable        | 1                                        |
| <i>Delirious state</i>                 | 1                     | 1                               | Unclear         | 0                                        |
| <i>Gamma GT/transaminase elevation</i> | 2                     | 0                               | Probable        | 0                                        |

Supplemental table 1: reported adverse events during asciminib treatment. TIA = transient ischemic attack; NSTEMI = non-ST elevation myocardial infarction.

TKI treatment pattern, all patients

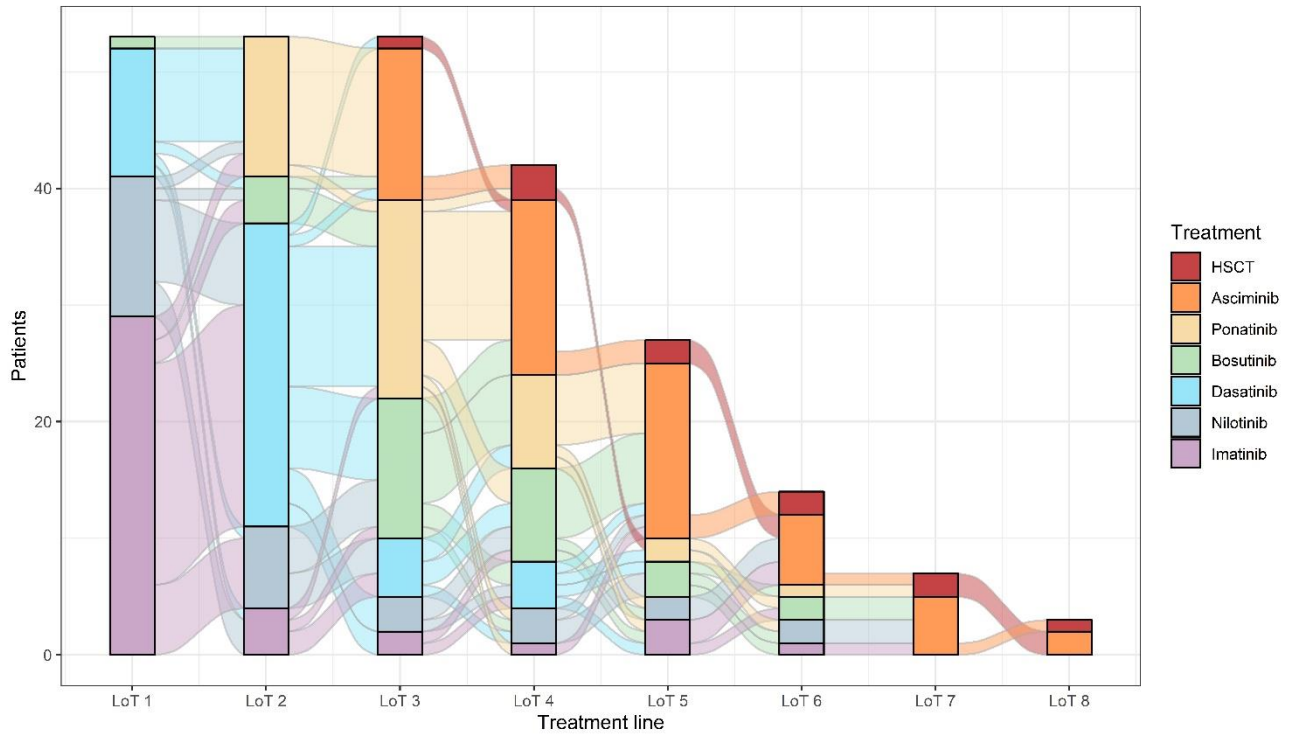

Supplemental figure 1: Tyrosine Kinase Inhibitor treatment patterns in CML patients treated with asciminib in the Dutch Early Access Programme (EAP). LoT = line of treatment, HSCT = hematopoietic stem cell transplantation.

# Treatment patterns and outcomes of asciminib in subgroups of CML patients

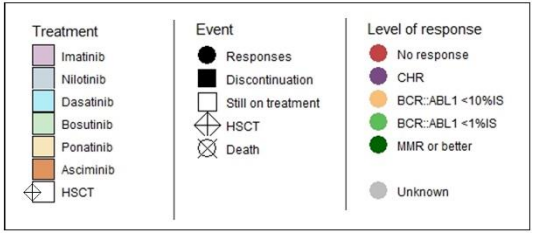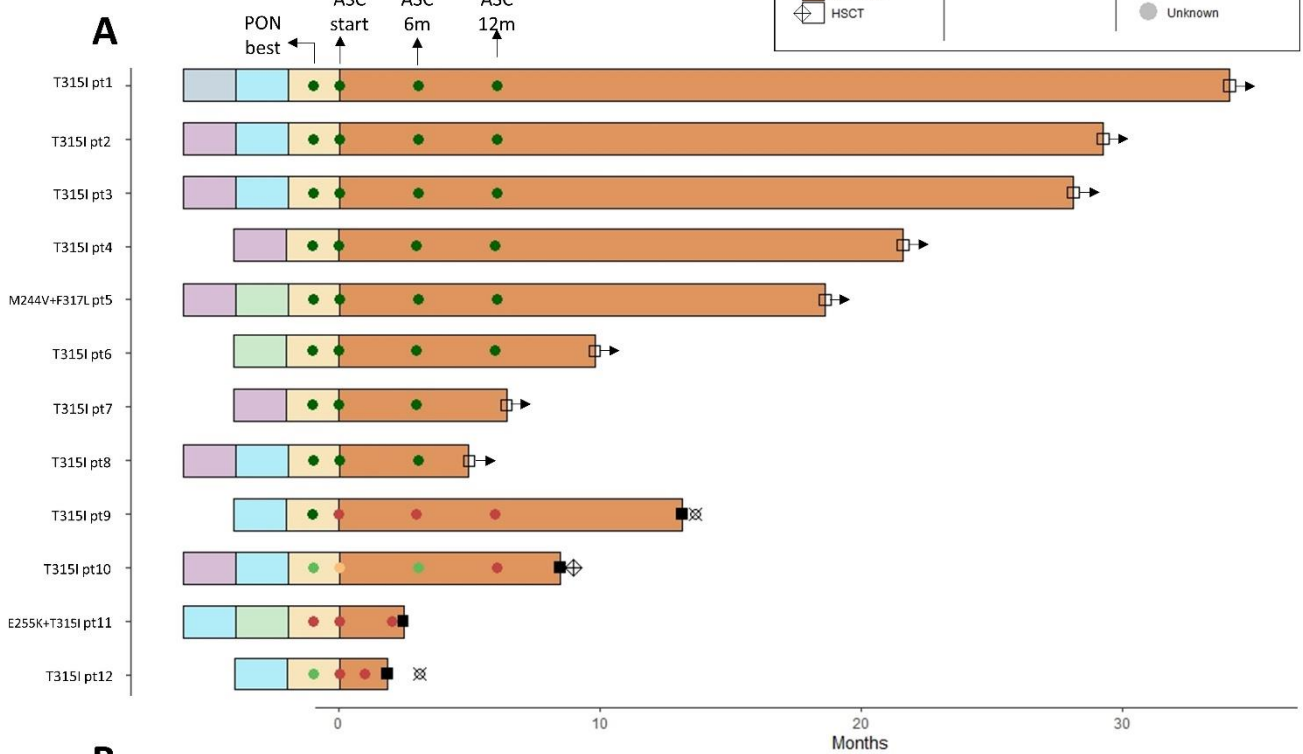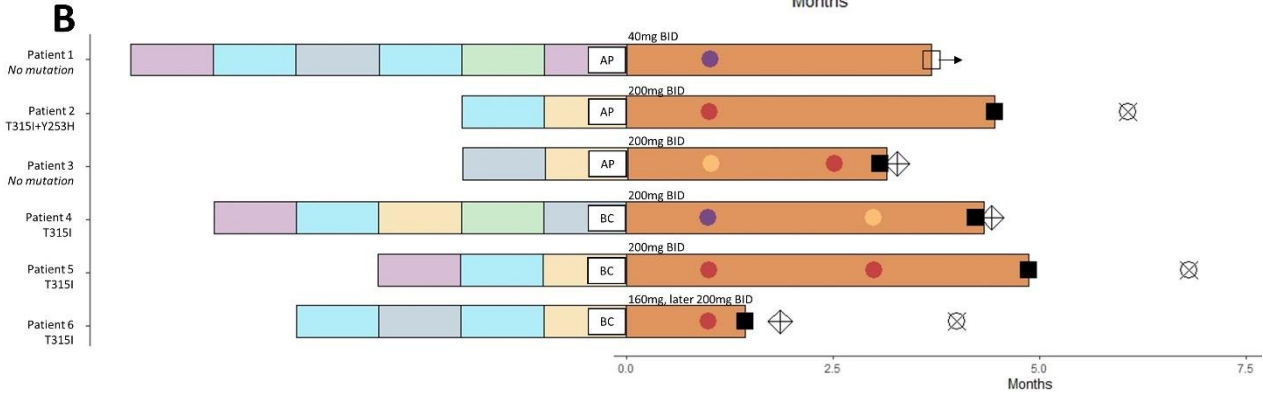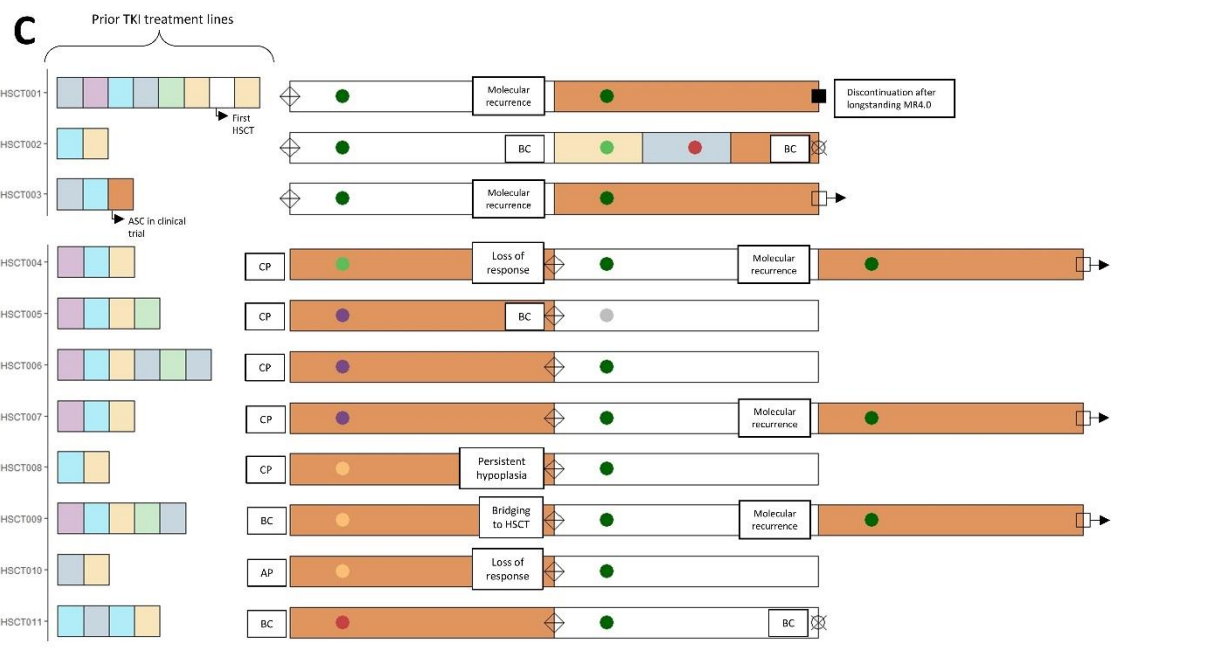

Supplemental figure 2: Treatment patterns and outcome of asciminib in specific subgroups of CML patients.

**A. Subgroup 1, CML CP patients harboring an ABL1 kinase domain mutation at asciminib commencement:** all patients had prior ponatinib exposure. The first eight patients discontinued ponatinib because of intolerance, the latter 4 patients discontinued ponatinib because of treatment failure.

**B. Subgroup 2, CML patients in Accelerated Phase (AP; n=3) or Blast Crisis (BC; n=3) at asciminib commencement:** five patients discontinued asciminib because of treatment failure, three of them proceeded to a hematopoietic stem cell transplantation (HSCT), three patients died (all of a CML-related cause).

**C. Subgroup 2, CML patients who underwent a hematopoietic stem cell transplantation (HSCT) prior or after asciminib treatment:** three patients received asciminib only after the HSCT; three patients received asciminib both prior and after HSCT.

Treatment modalities other than TKI or HSCT are not displayed in this figure. PON best = best response achieved during ponatinib; ASC start = level of response at asciminib commencement; BID = twice daily; CHR = complete hematologic response; MMR = major molecular response; CP = chronic phase; AP = accelerated phase; BC = blast crisis.
